# Supplementary material
Source: publisher figshare collection journal article supplement (https://acs.figshare.com/ndownloader/files/15163076)
Supplement: Supplementary file 1 [file 15163076]

## Supporting Information

### **Gap-tethered Au@AgAu Raman Tags for the Ratiometric Detection of MC-LR**

Yuan Zhao,<sup>\*,†</sup> Fangjie Zheng,<sup>†</sup> Wei Ke,<sup>†</sup> Wei Zhang,<sup>‡</sup> Lixia Shi,<sup>†</sup> Han Liu<sup>†</sup>

<sup>†</sup>Key Laboratory of Synthetic and Biological Colloids, Ministry of Education, School of Chemical and Material Engineering, Jiangnan University, Wuxi, Jiangsu 214122, China.

<sup>‡</sup>Chongqing Institute of Green and Intelligent Technology, Chinese Academy of Sciences, Chongqing, 400714, China.

Corresponding author. E-mail: [zhaoyuan@jiangnan.edu.cn](mailto:zhaoyuan@jiangnan.edu.cn)

## Table of Contents

**Figure S1.** (a) TEM image of Au NPs. (b) Statistical analysis of diameters for Au NPs.

**Figure S2.** Statistical analysis of gap size for Au@gap@AgAu NPs. (a) Au@gap@AgAu<sub>(1)</sub> NPs. (b) Au@gap@AgAu<sub>(2)</sub> NPs. (c) Au@gap@AgAu<sub>(3)</sub> NPs. (d) Au@gap@AgAu<sub>(4)</sub> NPs.

**Figure S3.** (a) Theoretically calculated optical absorption spectra of prepared Au@Ag@Au<sub>(2)</sub> NPs and Au@gap@AgAu<sub>(3)</sub> NPs. (b) Absorption spectra of prepared Au@Ag@Au NPs and Au@gap@AgAu NPs.

**Figure S4.** Raman spectra of Au@gap@AgAu<sub>(3)</sub> NPs using three different laser wavelengths.

**Figure S5.** (a) SERS spectra of 4-ATP molecules (from  $10^{-7}$  M to  $10^{-3}$  M) embedded in Au@gap@AgAu<sub>(3)</sub> NPs. (b) The plot of averaged Raman intensity at  $1078\text{ cm}^{-1}$  with different concentrations of 4-ATP.

**Figure S6.** (a) Time-depending SERS spectra of GO/Fe<sub>3</sub>O<sub>4</sub> NPs. (b) The corresponding RSD results of (a) calculated at  $1305\text{ cm}^{-1}$ . (c) Plots of the SERS intensities of Au@gap@AgAu NPs-GO/Fe<sub>3</sub>O<sub>4</sub> NPs assemblies at  $1305\text{ cm}^{-1}$  (red points) and GO/Fe<sub>3</sub>O<sub>4</sub> NPs at  $1305\text{ cm}^{-1}$  (blue points) vs number of times.

**Figure S7.** (a) Magnetization curves of GO/Fe<sub>3</sub>O<sub>4</sub> NPs, GO/Fe<sub>3</sub>O<sub>4</sub> NPs after adding 13% HNO<sub>3</sub> and GO/Fe<sub>3</sub>O<sub>4</sub> NPs after adding 30% H<sub>2</sub>O<sub>2</sub>. (b) Magnetic separation pictures of GO/Fe<sub>3</sub>O<sub>4</sub> NPs after treatment with 13% HNO<sub>3</sub> and 30% H<sub>2</sub>O<sub>2</sub>.

**Figure S8.**  $I_{1078}/I_{1305}$  values with different stored time (a), different temperatures (b), different salt concentrations (c) and different pH values (d).

**Table S1.** The detail sequences of aptamers of MC-LR.

**Table S2.** Detection of MC-LR spiked in Tai lake water.

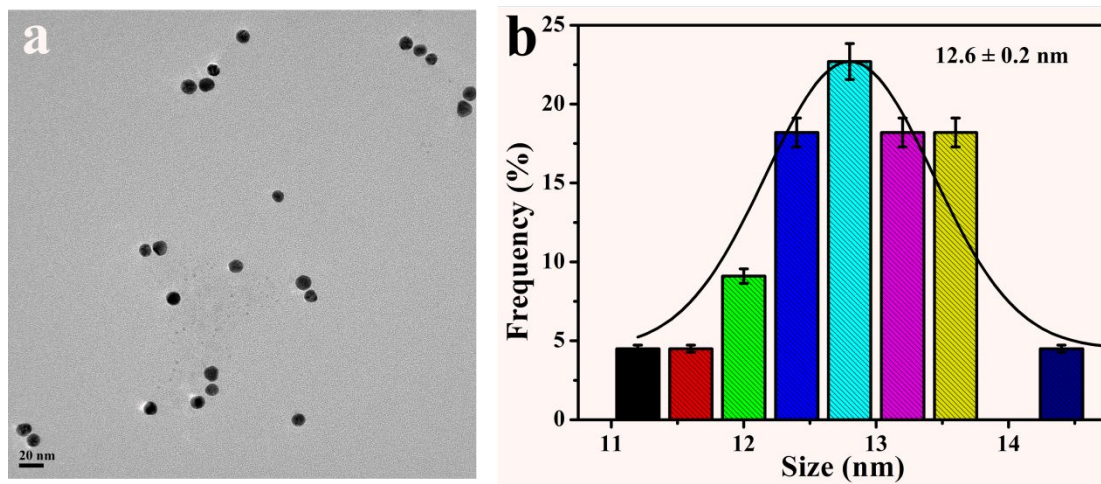

**Figure S1.** (a) TEM image of Au NPs. (b) Statistical analysis of diameters for Au NPs.

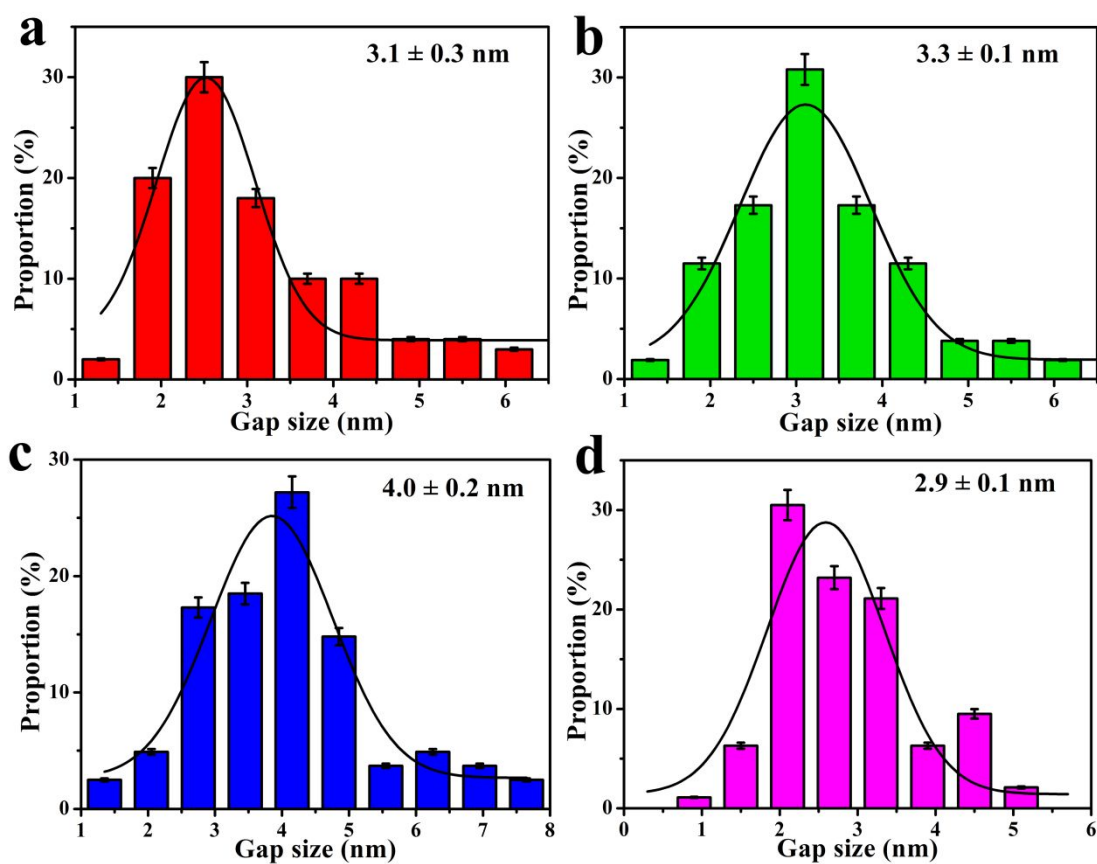

**Figure S2.** Statistical analysis of gap size for Au@gap@AgAu NPs. (a) Au@gap@AgAu<sub>(1)</sub> NPs. (b) Au@gap@AgAu<sub>(2)</sub> NPs. (c) Au@gap@AgAu<sub>(3)</sub> NPs. (d) Au@gap@AgAu<sub>(4)</sub> NPs.

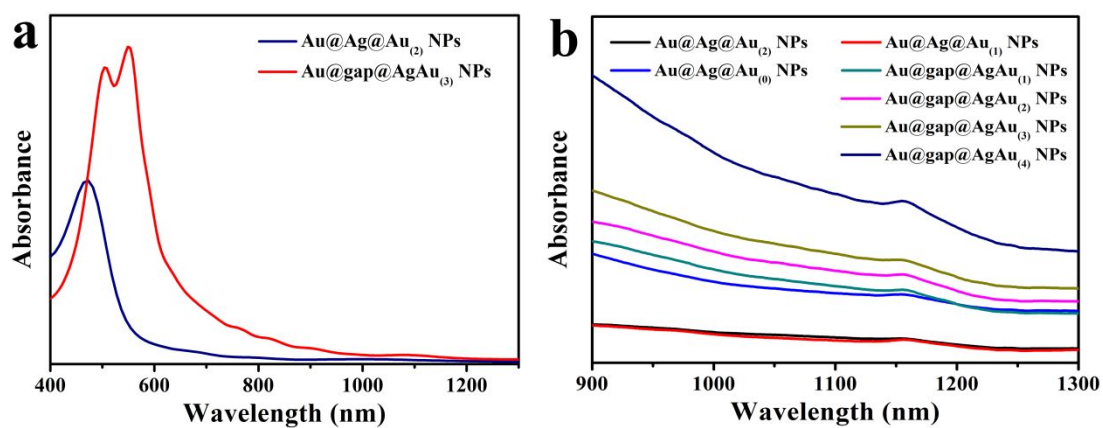

**Figure S3.** (a) Theoretically calculated optical absorption spectra of prepared  $\text{Au@Ag@Au}_{(2)}$  NPs and  $\text{Au@gap@AgAu}_{(3)}$  NPs. (b) Absorption spectra of prepared  $\text{Au@Ag@Au}$  NPs and  $\text{Au@gap@AgAu}$  NPs.

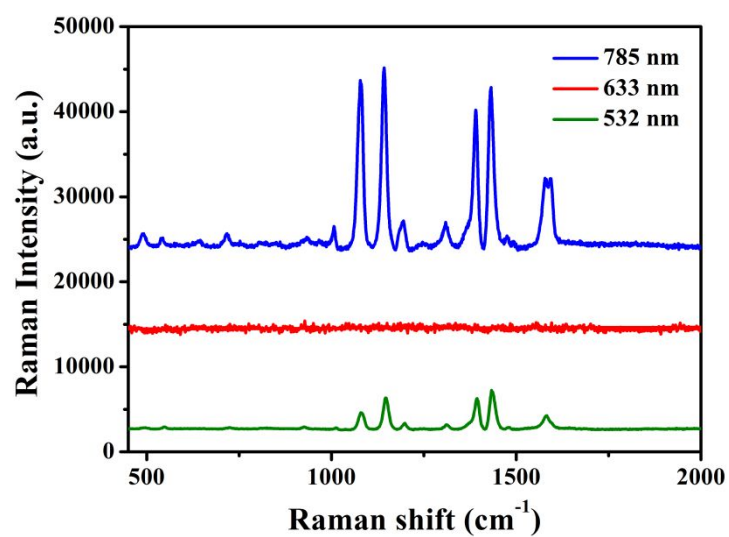

**Figure S4.** Raman spectra of Au@gap@AgAu<sub>3</sub> NPs using three different laser wavelengths.

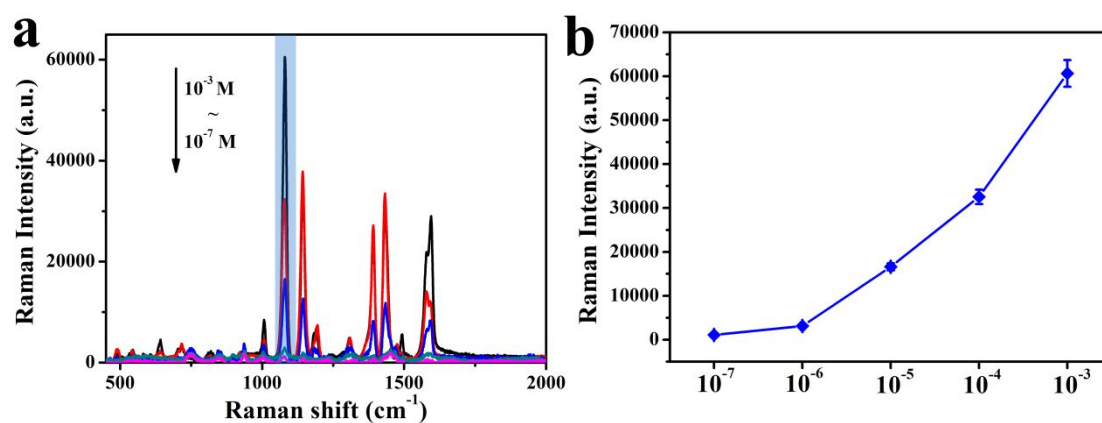

**Figure S5.** (a) SERS spectra of 4-ATP molecules (from  $10^{-7}$  M to  $10^{-3}$  M) embedded in Au@gap@AgAu<sub>(3)</sub> NPs. (b) The plot of averaged Raman intensity at 1078  $\text{cm}^{-1}$  with different concentrations of 4-ATP.

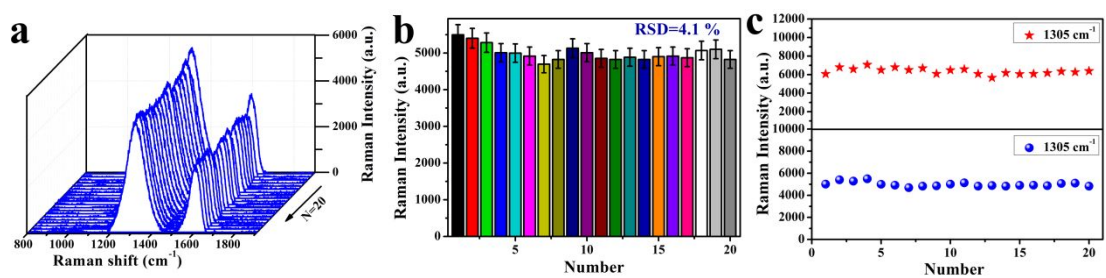

**Figure S6.** (a) Time-depending SERS spectra of GO/Fe<sub>3</sub>O<sub>4</sub> NPs. (b) The corresponding RSD results of (a) calculated at 1305 cm<sup>-1</sup>. (c) Plots of the SERS intensities of Au@gap@AgAu NPs-GO/Fe<sub>3</sub>O<sub>4</sub> NPs assemblies at 1305 cm<sup>-1</sup> (red points) and GO/Fe<sub>3</sub>O<sub>4</sub> NPs at 1305 cm<sup>-1</sup> (blue points) vs number of times.

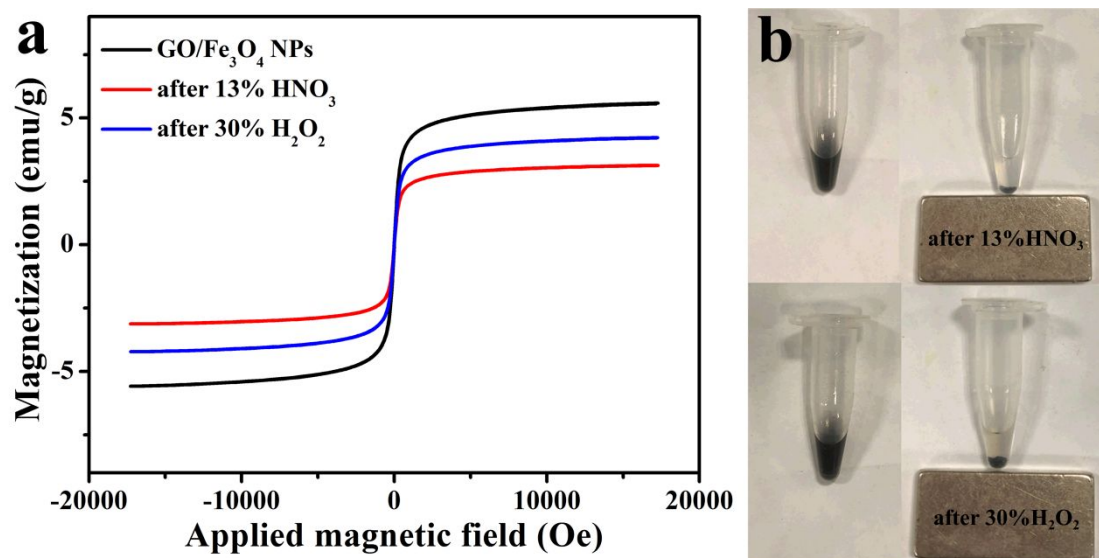

**Figure S7.** (a) Magnetization curves of GO/Fe<sub>3</sub>O<sub>4</sub> NPs, GO/Fe<sub>3</sub>O<sub>4</sub> NPs after adding 13% HNO<sub>3</sub> and GO/Fe<sub>3</sub>O<sub>4</sub> NPs after adding 30% H<sub>2</sub>O<sub>2</sub>. (b) Magnetic separation pictures of GO/Fe<sub>3</sub>O<sub>4</sub> NPs after treatment with 13% HNO<sub>3</sub> and 30% H<sub>2</sub>O<sub>2</sub>.

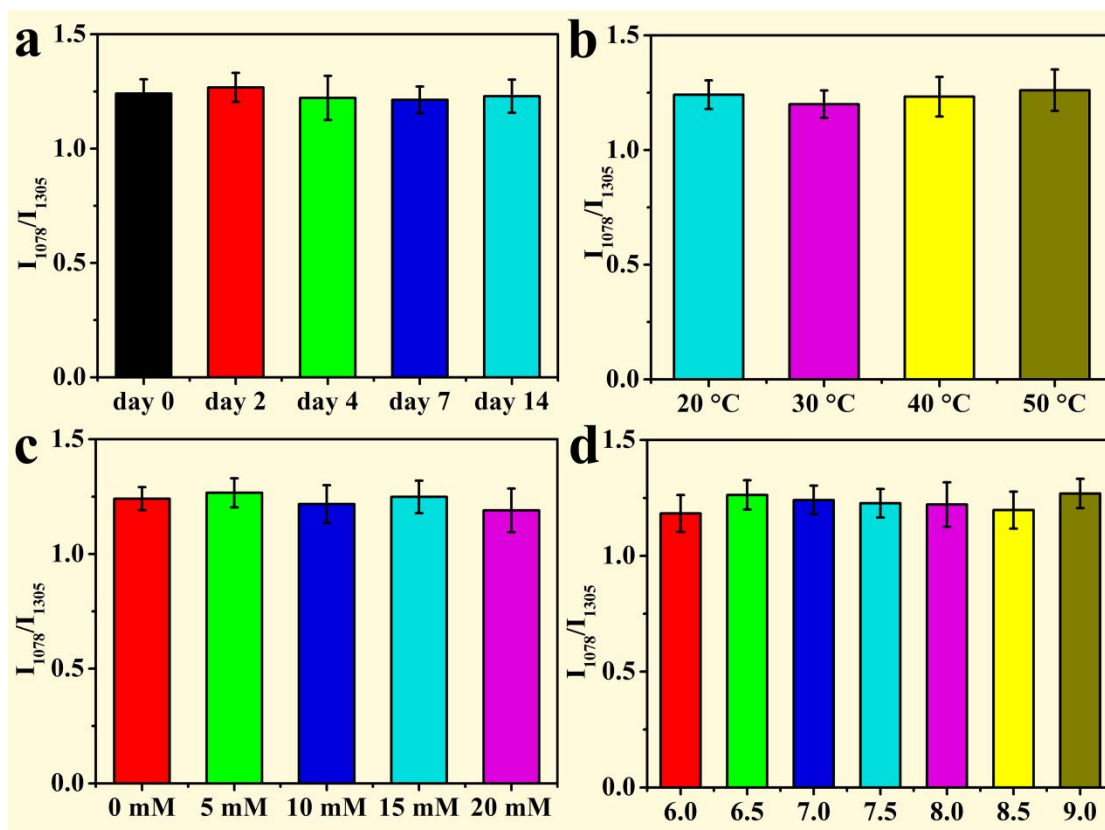

**Figure S8.**  $I_{1078}/I_{1305}$  values with different stored time (a), different temperatures (b), different salt concentrations (c) and different pH values (d).

**Table S1.** The detail sequences of aptamers of MC-LR.

| Name     | Sequences (5'-3')                                                                      |
|----------|----------------------------------------------------------------------------------------|
| Aptamers | -SH-GGC GCC AAA CAG GAC CAC CAT GAC AAT TAC CCA<br>TAC CAC CTC ATT ATG CCC CAT CTC CGC |

**Table S2.** Detection of MC-LR spiked in Tai lake water.

| Polluted | Original      | Spiked        | Detected           | Recovery     |
|----------|---------------|---------------|--------------------|--------------|
| water    | concentration | concentration | concentration      | (mean± SD)   |
|          | (ng/mL)       | (ng/mL)       | (mean ± SD, ng/mL) |              |
| 1        | 0.39          | 0.25          | 0.61 ± 0.07        | 95.31 ± 2.65 |
| 2        | 0.27          | 0.5           | 0.76 ± 0.12        | 98.70 ± 3.36 |
| 3        | 0.62          | 2.5           | 3.05 ± 0.43        | 97.76 ± 3.07 |
